# Supplementary material for: Directly induced human retinal ganglion cells mimic fetal RGCs and are neuroprotective after transplantation in vivo
Source: PubMed Central journal article supplement — Stem Cell Reports. 2022 Nov 10;17(12):2690–703. doi: 10.1016/j.stemcr.2022.10.011 (PMC9768574; doi:10.1016/j.stemcr.2022.10.011), 2022-11-10
Supplement: mmc2.pdf [file mmc2.pdf]

## Directly induced human retinal ganglion cells mimic fetal RGCs and are neuroprotective after transplantation *in vivo*

Ziming Luo,<sup>1,6</sup> Kun-Che Chang,<sup>1,2,3,6</sup> Suqian Wu,<sup>1,4</sup> Catalina Sun,<sup>1</sup> Xin Xia,<sup>1</sup> Michael Nahmou,<sup>1</sup> Minjuan Bian,<sup>1</sup> Rain R. Wen,<sup>1</sup> Ying Zhu,<sup>1</sup> Sahil Shah,<sup>1</sup> Bogdan Tanasa,<sup>1</sup> Marius Wernig,<sup>5</sup> and Jeffrey L. Goldberg<sup>1,\*</sup>

<sup>1</sup>Spencer Center for Vision Research, Byers Eye Institute, Stanford University School of Medicine, Palo Alto, CA 94304, USA

<sup>2</sup>Department of Ophthalmology and Neurobiology, School of Medicine, University of Pittsburgh, Pittsburgh, PA 15213, USA

<sup>3</sup>Graduate Institute of Medicine, College of Medicine, Kaohsiung Medical University, Kaohsiung 80708, Taiwan

<sup>4</sup>Shanghai Key Laboratory of Visual Impairment and Restoration, Department of Ophthalmology and Vision Science, Eye, Ear, Nose & Throat Hospital, Fudan University, Shanghai 200031, China

<sup>5</sup>Department of Pathology, School of Medicine, Stanford University, Palo Alto, CA 94304, USA

<sup>6</sup>These authors contributed equally

\*Correspondence: [luozm@stanford.edu](mailto:luozm@stanford.edu)

<https://doi.org/10.1016/j.stemcr.2022.10.011>

### SUMMARY

Retinal ganglion cell (RGC) replacement therapy could restore vision in glaucoma and other optic neuropathies. We developed a rapid protocol for directly induced RGC (iRGC) differentiation from human stem cells, leveraging overexpression of *NGN2*. Neuronal morphology and neurite growth were observed within 1 week of induction; characteristic RGC-specific gene expression confirmed identity. Calcium imaging demonstrated  $\gamma$ -aminobutyric acid (GABA)-induced excitation characteristic of immature RGCs. Single-cell RNA sequencing showed more similarities between iRGCs and early-stage fetal human RGCs than retinal organoid-derived RGCs. Intravitreally transplanted iRGCs survived and migrated into host retinas independent of prior optic nerve trauma, but iRGCs protected host RGCs from neurodegeneration. These data demonstrate rapid iRGC generation *in vitro* into an immature cell with high similarity to human fetal RGCs and capacity for retinal integration after transplantation and neuroprotective function after optic nerve injury. The simplicity of this system may benefit translational studies on human RGCs.

### INTRODUCTION

In glaucoma and optic neuropathies, retinal ganglion cell (RGC) loss is irreversible and leads to permanent visual impairment. Cell replacement therapy is a promising approach for treating advanced optic neuropathies. Primary RGC transplantation in animal models has been demonstrated successfully in prior studies (Hertz et al., 2014a; Venugopalan et al., 2016), but a supply of primary donor cells would be very limited. Thus, there is an unmet need to develop a stem cell-derived RGC therapy not only to provide protection to remaining neurons but also to restore vision loss.

Existing protocols generally include the following steps during stem cell-derived RGC differentiation. Stem cells are first directed to an anterior neural fate with Dickkopf-1 (*Dkk-1*; a Wnt inhibitor), Noggin (a bone morphogenetic protein inhibitor), and insulin growth factor 1 (*IGF-1*) (Lamba et al., 2006). Subsequently, the presence of basic fibroblast growth factor (*bFGF*) pushes the stem cells to an eye field fate, an essential step during retinogenesis (Furukawa et al., 1997; Mathers et al., 1997). Then progeny are differentiated into retinal progenitor cells (*CHX10*-/*PAX6*-positive) and finally into RGC-like cells (*HUC/D*-positive). In addition to supplying several signaling pathway regulators during neural induction,

RGC fate can also be directed by overexpressing several essential transcription factors. For example, overexpressing *ATOH7* allows generation of RGC-like cells from mouse and human induced pluripotent stem cells (iPSCs; including human iPSCs [hiPSCs] reprogrammed from human Tenon's capsule fibroblasts) (Chen et al., 2010; Deng et al., 2016; Xie et al., 2014). Exogenous *SOX4* expression can also greatly potentiate differentiation of RGCs from hiPSCs and shows a synergistic effect with *ATOH7* on potentiating RGC differentiation (Chang et al., 2017).

However, these previous protocols usually take 2–4 weeks for RGC differentiation, and most such differentiation protocols have not explored electrophysiologic differentiation or suitability for transplantation and integration into the retina *in vivo*. Therefore, we aimed to establish a rapid differentiation method in the present study. Here we developed a rapid protocol for induced RGC (iRGC) differentiation from human embryonic stem cells (hESCs) and hiPSCs, driven by expression of Neurogenin-2 (*NGN2*), that requires less than 10 days. Physiological examination using calcium imaging in response to GABA stimulation was used to stage iRGC maturation compared with primary mouse RGCs. Single-cell transcriptional profiling confirmed iRGC fate compared with human fetal RGCs. Finally, we showed that iRGCs could survive *in vivo* on rodent retinas after intravitreal injection. These data support

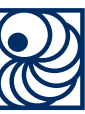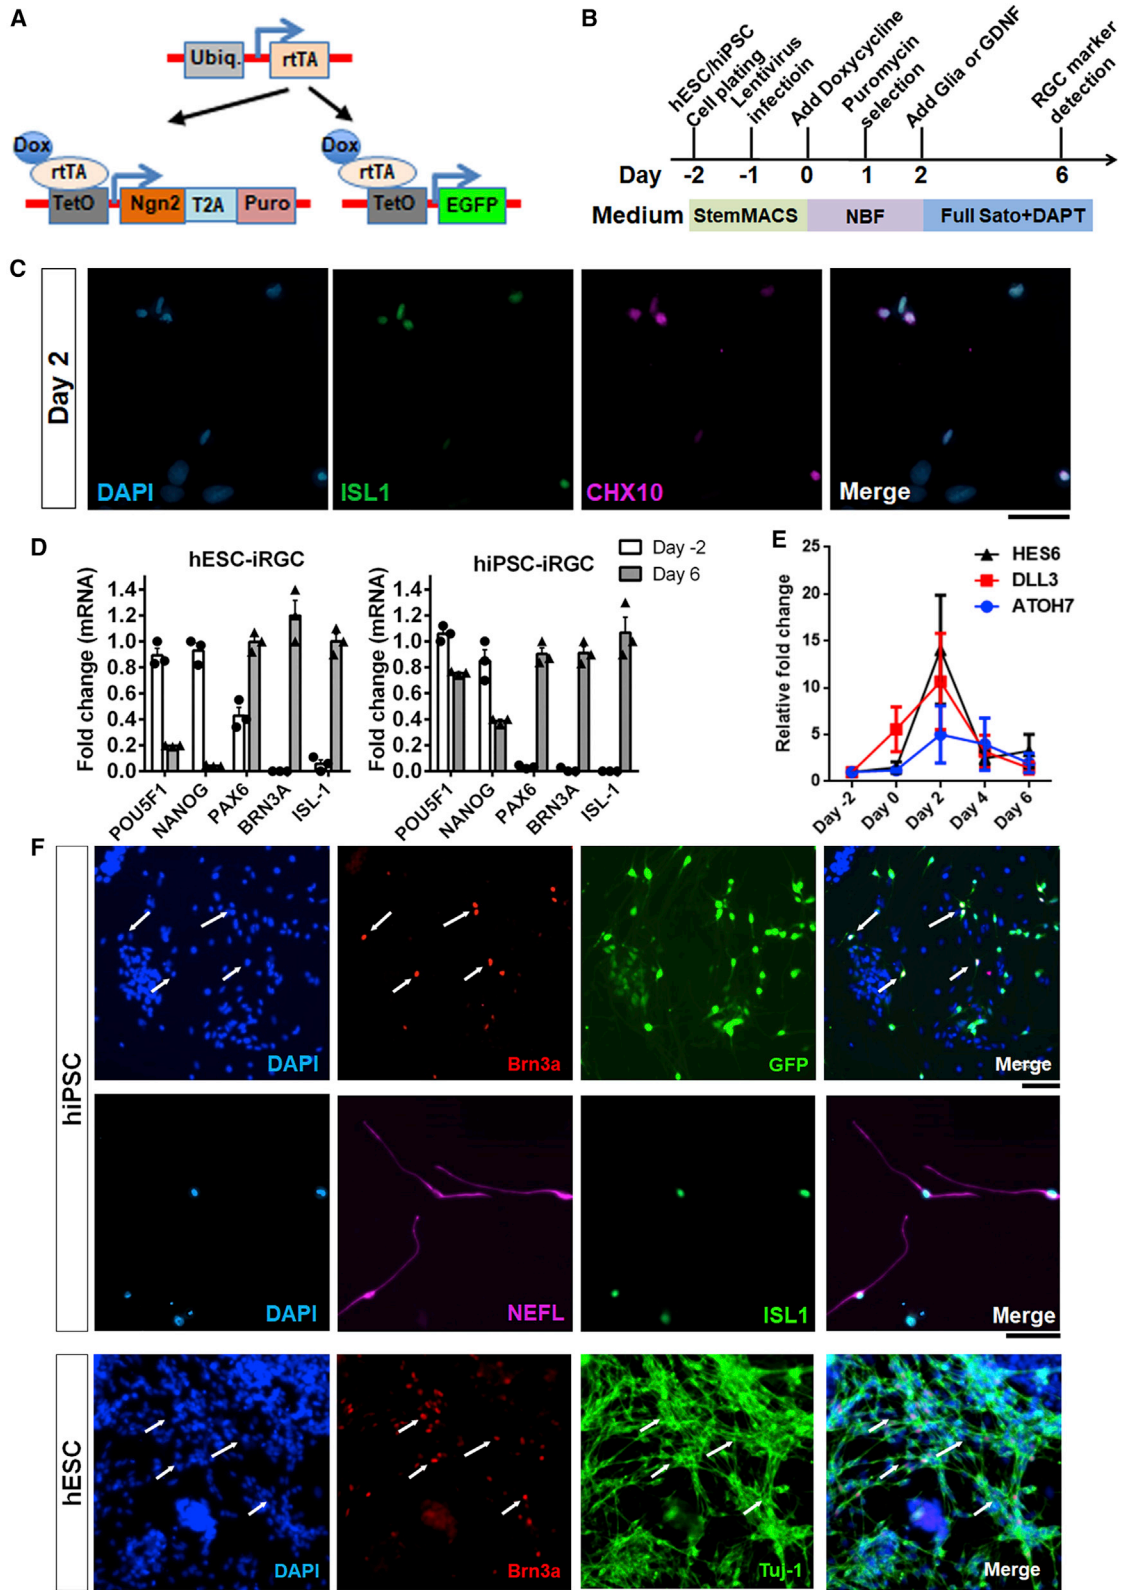

(legend on next page)

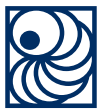

cell replacement therapy as a potential treatment for RGC loss in optic neuropathies.

## RESULTS

### Rapidly inducing stem cell-derived RGCs by *NGN2* overexpression

We extended the application of a previous rapid induced-neuron protocol that leverages *NGN2* expression (Zhang et al., 2013) to accelerate RGC differentiation from human stem cells. We transduced stem cells with three lentiviruses carrying constitutive expression of rtTA for tetracycline-inducible expression of *NGN2* and GFP (Figure 1A). To directly differentiate stem cells into RGC-like cells, we slightly modified the previously published culture approach by replacing glial cells with glial cell-derived neurotrophic factor (GDNF) on day 2 and changed the medium to a commonly used RGC SATO growth medium (Wu et al., 2018) plus the Notch inhibitor DAPT for another 4 days (Figure 1B). On day 2, after *NGN2* overexpression and before switching to the RGC culture medium, some cells were already expressing *CHX10*, a retinal progenitor marker (Figure 1C). To investigate the status of cell differentiation, we utilized qRT-PCR to measure gene expression of the stem cell markers *POU5F1* and *NANOG*, the neural progenitor cell marker *PAX6*, and the RGC markers *BRN3A* and *ISL-1* on days 2 and 6 for hiPSCs and hESCs. We observed reductions of *POU5F1* and *NANOG* and elevation of *PAX6*, *BRN3A*, and *ISL-1* on day 6 compared with day -2, indicating loss of stem cell pluripotency and induction of neuronal fate, consistent with RGC marker expression (Figure 1D). Because previous studies have shown that *NGN2* drove neuronal differentiation by activating *ATOH7*, *DLL3*, and *HES6* (Hufnagel et al., 2010; Smith et al., 2016), we performed qRT-PCR through the first week of differentiation to evaluate the expression of these genes. The results demonstrated that, after turning on *NGN2* by doxycycline, *ATOH7*, *DLL3*, and *HES6* were transiently upregulated before returning to baseline expression (Figure 1E). By 1 week, 14% and 20% of cells were Brn3a positive in

hiPSC-iRGC and hESC-iRGC cultures, respectively. These cells exhibited typical RGC morphology, extending neurites labeled by the axonal skeleton markers NEFL and Tuj1 (Figure 1F).

### iRGCs have similar electrophysiological responses as immature primary RGCs

Previous studies have shown that GABA<sub>A</sub> receptor activation is excitatory in immature RGCs (Venugopalan et al., 2020). When stimulated by a selective GABA<sub>A</sub> agonist such as muscimol (Wang et al., 2007), immature RGCs depolarize and demonstrate rapid calcium entry, visualized by calcium imaging with Fluo 4-AM. We compared iRGCs after 6 days of differentiation with primary RGCs from post-natal day 2 (P2), which are developmentally immature. iRGCs and primary RGCs showed Ca<sup>2+</sup> influx when exposed to muscimol (Figure 2), which resembles the effect of KCl-induced depolarization (Figure 2) and is in contrast to the lack of depolarization-induced calcium entry in mature RGCs (Venugopalan et al., 2020). These data show that rapidly induced RGCs predominantly exhibit immature electrophysiologic maturation, as measured by response to GABA<sub>A</sub> receptor activation.

### Single-cell transcriptional profiling demonstrates iRGC differentiation

To gain insight into cell fate determination during iRGC differentiation, we performed single-cell RNA sequencing (scRNA-seq) analysis on differentiated cells collected on day 6. In total, 2,552 cells were included in the computational analysis, and the data were visualized by t-distributed stochastic neighbor embedding (tSNE) dimensional reduction (Figure 3A). We identified three different cell types generated in this differentiation, including pluripotent cells (*POU5F1* and *SFRP2* positive), mesenchymal cells (*VIM*, *DES*, and *COL1A2* positive), and iRGCs (Figure 3B). The iRGCs expressed several RGC markers, including *SNCG*, *NEFL*, *GAP43*, *ELAVL4* (*HuD*), and *ISL1* (clusters 3 and 4) (Figure 3C). *ATOH7*, which is thought to be a gene signature of the transitioning cell population during retinal

#### Figure 1. Overexpression of *NGN2* drives induced RGC (iRGC) differentiation

(A) Design of lentiviral vectors for *NGN2*-mediated differentiation of hESCs and hiPSCs to iRGCs (modified from Zhang et al., 2013). Cells were transduced with rtTA, which complexes with doxycycline to bind to the TetOn promoter, and either Tet promoter *NGN2* or EGFP gene expression vectors.

(B) Flow diagram of iRGC cell generation (adapted from Zhang et al., 2013).

(C) After *NGN2* expression was activated by doxycycline, human stem cells were directed to a retinal progenitor cell fate expressing *ISL1* and *CHX10*. Scale bar, 200  $\mu$ m.

(D) Expression of the pluripotent markers *POU5F1* and *NANOG* decreased and the neural progenitor marker *PAX6* increased in the first week of differentiation. The RGC markers Brn3a and *ISL1* were significantly increased on day 6 (N = 3).

(E) Transient expression of *ATOH7*, *DLL3*, and *HES6* after *NGN2* overexpression (N = 3). Scale bar, 50  $\mu$ m.

(F) hiPSCs and hESCs were differentiated into RGC-like cells and harvested on day 6. Brn3a was used as an RGC marker in both cultures, whereas NEFL and Tuj-1 illuminate the extending axons.

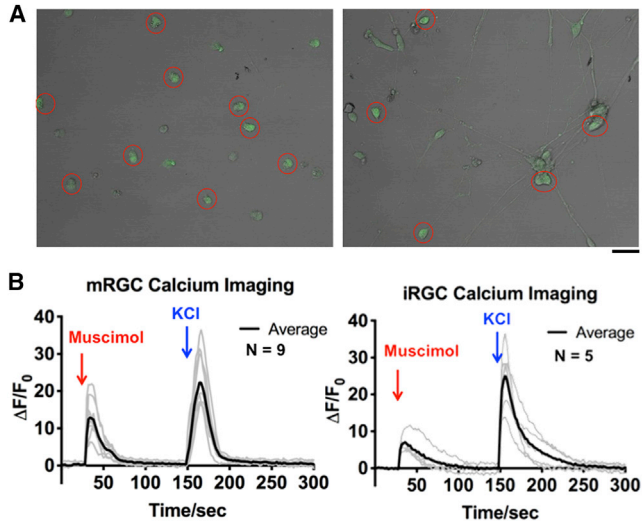

**Figure 2. iRGCs demonstrate electrophysiological properties similar to immature primary mouse RGCs**

(A) iRGCs were observed under a bright field to identify a region of interest (ROI; red circles).

(B) Calcium imaging of iRGCs shows calcium influx consistent with an excitatory GABA response to muscimol, similar to immature P2 mouse RGCs. Scale bar, 50  $\mu\text{m}$ .

development (Sridhar et al., 2020), was barely detectable in all cell clusters. These results were consistent with our previous qRT-PCR data showing that *ATOH7* expression went back to baseline after the first few days of differentiation. Similar to human fetal RGCs (Luo et al., 2019), *BRN3A* (*POU4F1*) was dominant in the iRGCs rather than *BRN3B* (*POU4F2*). iRGCs highly expressed axon skeleton markers, including *NEFL*, *NEFM*, and *MAP2*.

To delineate the cell fate determination process in the present rapid protocol, we used Monocle 2 to reorder the cells based on their stage-specific gene expression pattern and reconstruct their cell fate determination timeline. This algorithm arranged cells expressing mitotic cell cycle markers as the beginning of differentiation, labeled pseudo-time 0 (Figure 3D). Then developmental lineages were estimated by ranking all cell clusters in a temporal manner. The bifurcating trajectory led to two main lineages derived from the initiating stem cells, terminating in one lineage as iRGCs and in the other as mesenchymal cells (Figure 3D). Several genes involved in directing RGC fate determination were analyzed across lineages; for example, *SOX4* and *SOX11* have been shown to be key factors regulating RGC specification (Chang et al., 2017) and were significantly upregulated in cells in the iRGC lineage (Figure 3E). These results suggest that, although there was a cell mixture in the differentiation cultures, iRGCs were still effectively generated by overexpressing *NGN2*.

### iRGCs show similarity to fetal RGCs more than retinal organoid-derived RGCs

To evaluate how well the iRGCs in the present system mimicked RGCs in the developing human retina, we performed unbiased clustering to map our iRGC subsets (clusters 3 and 4 in Figure 3) to the combined dataset of day 59 and day 82 fetal human retinas. RGCs, amacrine cells, retinal progenitors, and photoreceptor cells were identified by typical marker gene expression (Figure 4A). Visualized by uniform manifold approximation and projection (UMAP) dimensional reduction, iRGCs were distributed near the fetal RGC clusters, indicating their similarities. However, the majority of these iRGCs did not overlap with fetal RGCs, which suggested that they were not identical (Figure 4B). A heatmap of variable genes showed that these three RGC clusters shared similar RGC marker genes, but cluster 10, which mostly consisted of iRGCs, also showed some differences compared with the other two clusters (Figure 4C). Gene Ontology (GO) enrichment found that fetal RGCs highly expressed genes involved in ATP synthesis and ATP utilization, whereas in iRGCs, genes involved in ubiquitination and cell-cell adhesion were predominant as differentially enriched ontologies (Figure 4D).

Retinal organoids, stem cell-derived tissues that recapitulate fetal retinal development, are another promising source of donor RGCs. We compared iRGCs with whole retinal organoids and organoid-derived RGCs. We mapped the iRGCs to integrated day 45 and day 60 retinal organoid data. After identifying the cell types (Figure 5A), we found that iRGCs fall into similar clusters as organoid RGCs but without a substantial overlap (Figure 5B). To more closely compare organoid-derived RGCs and iRGCs, we selected day 45 retinal organoid-derived RGCs based on belonging to clusters highly expressing the *BRN3* or *GAP43* gene and combined them with iRGCs, followed by re-clustering (Figure 5C). The datasets largely overlapped, and the contributions of each subgroup were almost equal from both samples in the resulting clusters (Figure 5D). Although the UMAP plot indicates that they shared high similarities among samples and sub-clusters, several genes were differentially expressed in iRGCs compared with organoid RGCs (Figure 5E). For example, RGCs from retinal organoids still expressed *ATOH7* but not *NEFL* on day 45. In contrast, iRGCs from our rapid protocol highly expressed *NEFL*, consistent with axon growth observed in culture. The two samples showed distinct preferences of *BRN3* subtype expression. In iRGCs, cells mainly expressed *BRN3A* (*POU4F1*), similar to fetal human RGCs (Luo et al., 2019), whereas most organoid RGCs were positive for *BRN3B* (*POU4F2*). These data show that, although iRGCs only went through less than 2 weeks of differentiation, they already gained similar transcriptomic maturity as 2-month-old human fetal RGCs and retinal organoid-derived RGCs.



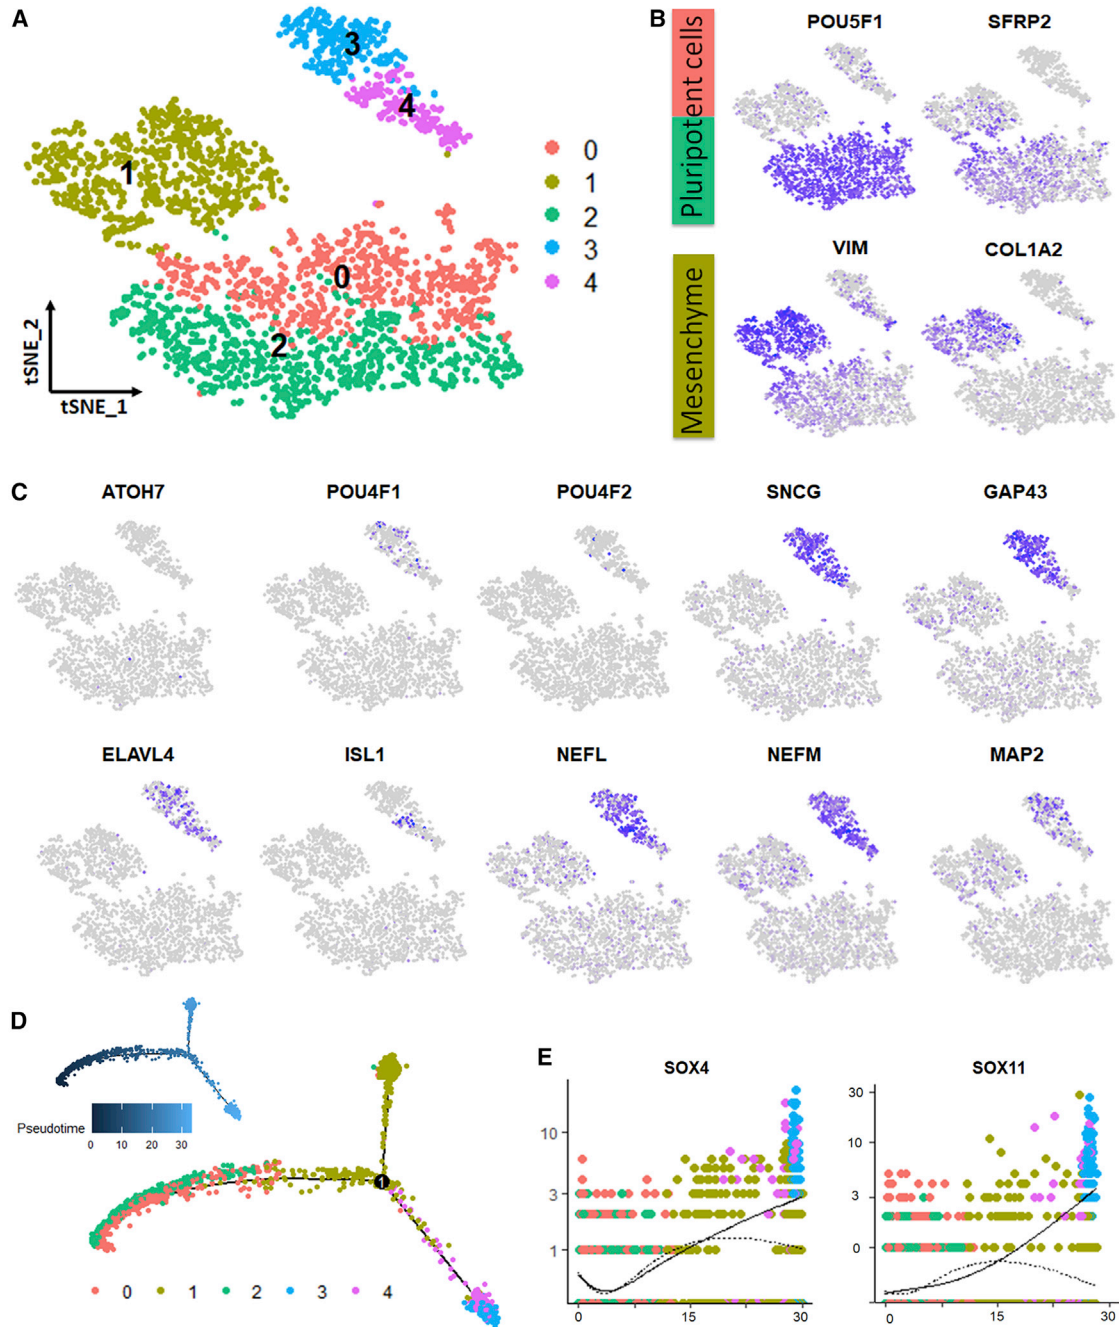

**Figure 3. Single-cell transcriptional profiling of differentiated cells**

(A) tSNE plot for hiPSC-induced iRGCs shows 3 major groups statistically separated into 5 clusters. (B) Expression of representative cell-type-specific genes. Purple indicates high expression, and gray indicates low expression. Cells in clusters 0 and 2 express *POU5F1* and *SFRP2*, consistent with pluripotent cell identity. Cluster 1 cells express the extracellular matrix markers *VIM* and *COL1A2*, indicating mesenchymal identity. (C) Expression of the RGC-specific markers *SNCG*, *GAP43*, *ELAVL4*, *ISL1*, *POU4F1*, and *POU4F2* and the axon-associated genes *NEFL*, *NEFM*, and *MAP2* is almost completely preferentially localized to clusters 3 and 4, except for *ATOH7*, which is not expressed significantly in any clusters, and *RBPM5*, which is expressed throughout all clusters.

(legend continued on next page)

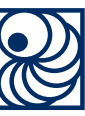

### iRGCs are transcriptionally distinct from NGN-2 induced neurons (iNs) and brain organoids

To determine whether the iRGCs generated in this modified protocol are transcriptionally different from those in the original iN protocol (Lin et al., 2021), we compared scRNA-seq profiles among day 5 iNs and day 59 fetal RGCs and iRGCs (Figures S1A–S1C). The iRGCs essentially all overlapped with subsets of fetal RGCs and shared a diversity of some typical RGC markers like POU4F2 and RBPMS, whereas the iNs contained some progeny that overlapped with these fetal RGCs, but the two major iN progeny clusters did not overlap with fetal RGCs and expressed non-RGC markers like *NEUROD2* and *PHOX2B* (Figures S1B and S1C). These data indicate that iRGCs are transcriptionally more similar to fetal RGCs than the majority of iNs.

Next we compared the mixture of cells in our system with brain organoid transcriptomics profiles to confirm the modified system was deriving RGCs rather than generic neurons similar to brain-directed cultures. The whole dataset of our differentiated cells was combined with the published day 93 cortical organoid dataset (Figure S1D). Grouped by samples, the UMAP plot demonstrated that, although the two cell populations interlaced in UMAP space, iRGC progeny segregated as distinct clusters from adjacent clusters of organoid cells with almost no overlap (Figure S1E). By examining several markers typically expressed in cortical neurons, we found that only a neural crest marker was slightly expressed in our sample. *VIM*-positive mesenchymal cells were observed in both samples. In comparison, most of the RGC markers were distinctly expressed in iRGCs (Figure S1F). These results indicated that the rapid protocol is reliably deriving RGC-specific progeny with these cell culture modifications.

### *In vivo* iRGC transplantation showed a neuroprotective effect

We next wanted to determine whether the differentiated cells survive and migrate into a host retina after transplantation. To track transplanted cells, we labeled differentiated cells with lentivirus (LV)-green fluorescent protein (LV-GFP), but we needed to rule out two critical sources of confounding. To exclude false positive identification of transplanted cells caused by virus contamination leading to host RGC transduction, we injected Cre-GFP-LV versus Cre-GFP-transduced cells into floxed-tdTomato mice. Any

viral carryover in the donor cells or material transfer of Cre protein would be expected to turn on tdTomato in host retinal cells. Flat-mount imaging showed that intravitreal injection of Cre-GFP-LV transduced endogenous RGCs and turned on Cre-mediated expression of tdTomato (Figure 6A, left panels). However, after transplantation of donor cells that were transduced previously by Cre-GFP-LV, we did not observe any tdTomato signal (Figure 6A, right panels). Thus, transducing donor cells *ex vivo* does not lead to viral or protein transfer after cell transplantation *in vivo*.

To explore transplantation and integration of differentiated cells, we intravitreally injected cells into adult rat eyes and observed that GFP-positive donor cells survive in the host retina 1 week after transplantation. Cross-sections of the retina revealed that donor cells resided on the ganglion cell layer, rarely expressing RBPMS as host RGCs do (Figure 6B) but consistent with the lack of *RBPMS* detection in the iRGC scRNA-seq. The origin of GFP-labeled cells was confirmed by human nucleus staining (Figure 6B), again providing data against the possibility of material transfer (Pearson et al., 2016). By 4 weeks after transplantation *in vivo*, donor iRGCs survived and migrated into and, in some cases, past the ganglion cell layer in the mouse retina and, by this time point, were essentially all RBPMS positive (Figure 6C). Thus, iRGCs are competent to integrate into the normal adult retina after intravitreal transplantation.

Because the long-term goal of RGC differentiation is to treat RGC loss, we next transplanted the differentiated cells to adult mouse retinas after optic nerve crush (ONC) injury. We first performed the transplants in sham or immediately after ONC. We observed donor cell survival 1 week and 1 month after transplantation. Surprisingly, fewer GFP-positive donor cells were observed in ONC eyes compared with sham eyes (Figure 7A). The reduction of donor cell survival in the ONC group might be due to trauma-induced inflammation in the eye. There was no significant difference in cell numbers between 1 week and 1 month after transplantation in the sham or ONC groups, suggesting that donor cell survival remains stable after 1 week of transplantation. To understand whether the ONC-induced inflammatory response influences donor cell survival, we transplanted differentiated cells 1 month after ONC. Similar to immediate transplantation, we found no increase in GFP-positive cells 1 week or 1 month after transplantation (Figure 7A). Putting together the data across the sham and acute versus

(D) Monocle 2 reveals lineage bifurcation in the differentiated cells. The pluripotent cells (clusters 0 and 2 from A) were distributed at the beginning of the trajectory (pseudo-time 0), and then the cells went into two different cell fates: mesenchymal cells (cluster 1 from A) or RGCs (clusters 3 and 4 from A).

(E) Expression of the RGC specification transcription factors *SOX4* and *SOX11* over pseudo-time. Dashed lines and solid lines show expression in mesenchymal and iRGC lineages, respectively, and suggest *SOX4* and *SOX11* gene expression preferentially rise in iRGCs.

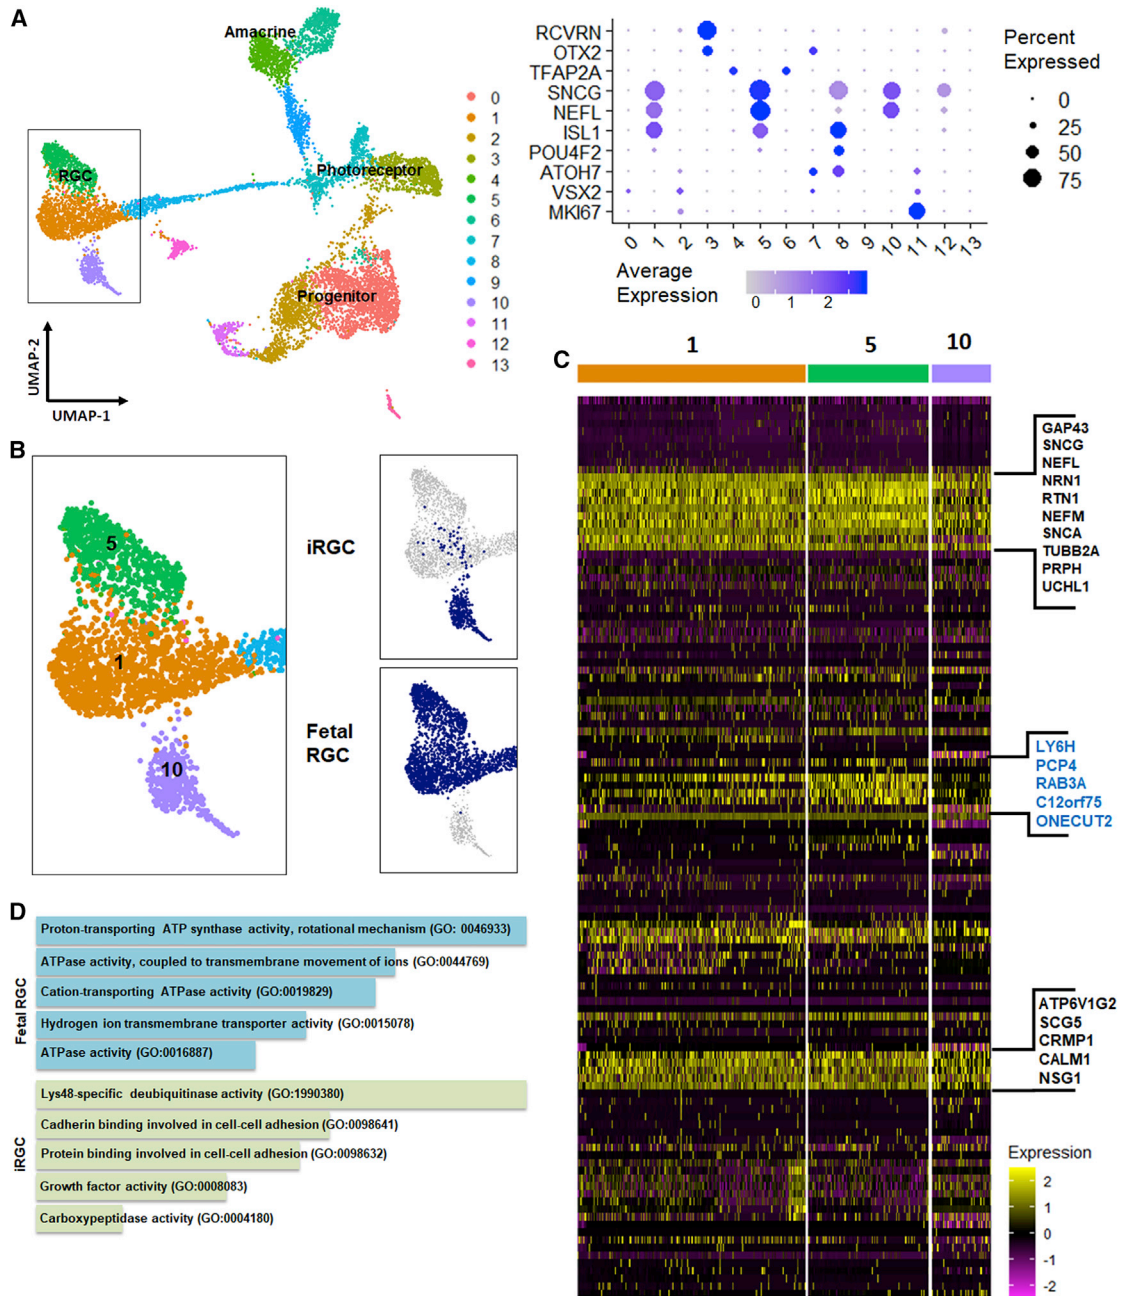

#### Figure 4. iRGCs show transcriptional similarities to a subset of RGCs from fetal retinas

(A) Combined UMAP plot of day 59 fetal retina, day 82 fetal retina, and iRGCs shows 14 clusters, representing at least four main retinal cell types identified by typical markers shown in dot plots.

(B) Focusing on the RGC segment (boxed in A), UMAP plotted by tissue of origin suggests that iRGCs form a unique subtype closest to cluster 1- and cluster 5-type RGCs found in fetal retinas of both ages.

(C) Heatmap of genes (black) driving cluster separation among clusters 1, 5, and 10, demonstrating the few differences (blue) between fetal RGCs and iRGCs.

(D) Functional enrichment of genes that are significantly expressed in fetal RGCs and iRGCs.

chronic ONC experiments, these data suggest that ONC inhibits the survival and/or integration of donor cells after transplantation.

Finally, we wanted to determine whether donor cells influence host RGC survival after ONC. Host RGCs were identified by RBPMS staining (Figure 7B). RBPMS-positive cells



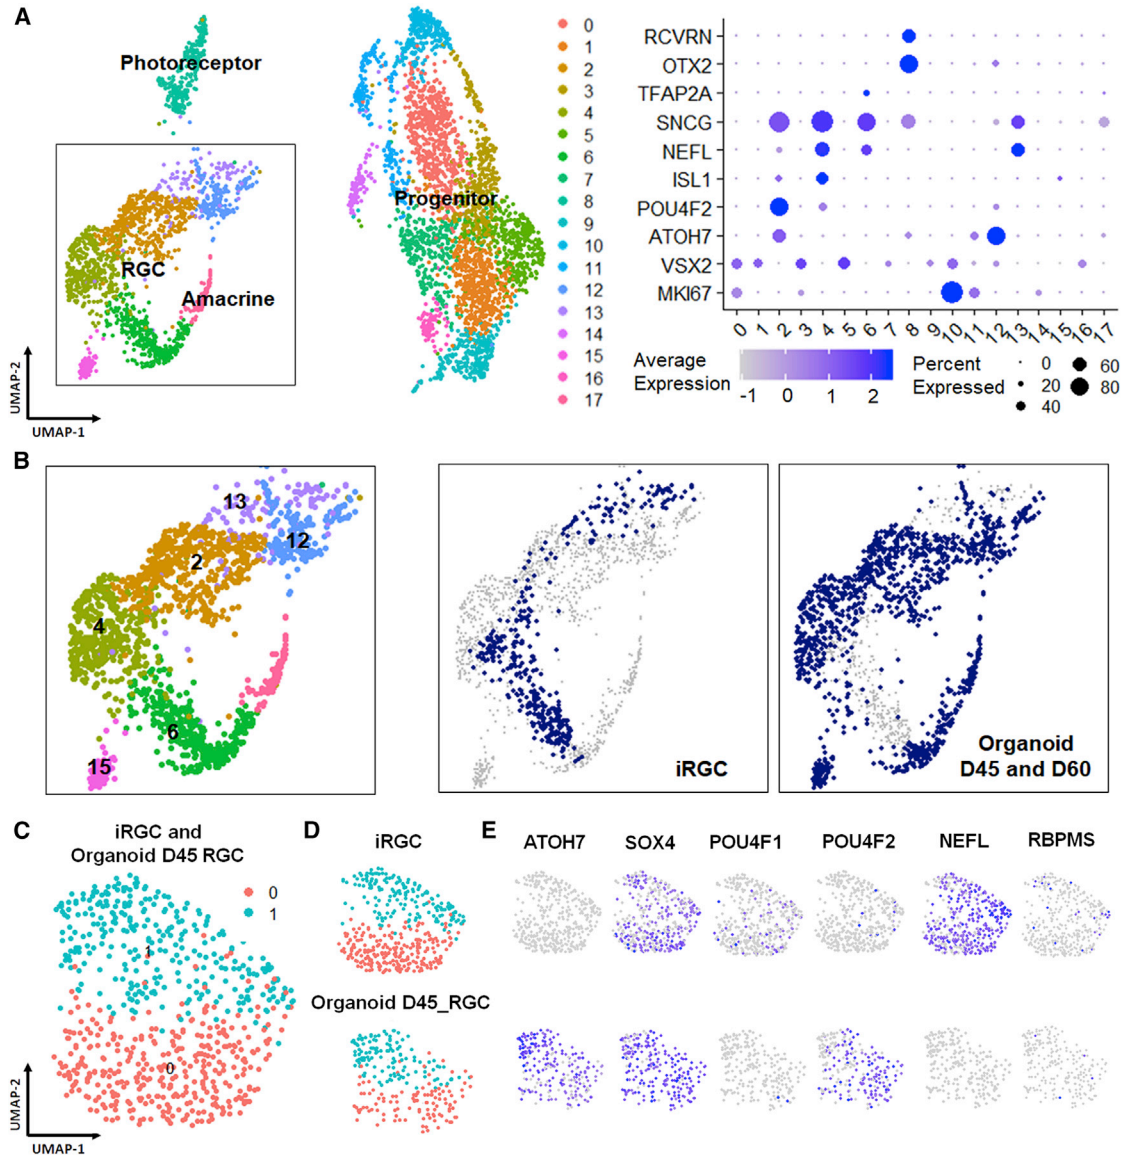

### Figure 5. iRGCs show transcriptional overlap with RGCs from retinal organoids

(A) Combined UMAP plots of RGCs from day 45 and day 60 retinal organoids and iRGCs. Four main retinal cell types were identified by typical markers shown in dot plots.

(B) Focusing on the RGC segment (boxed in A), UMAP plotted by tissue of origin demonstrates fully overlapping clustering between iRGCs and organoid-derived RGCs.

(C–E) Datasets of iRGCs (clusters 3 and 4 from Figure 3) and of day 45 retinal organoid-derived RGCs (defined by independent cluster analysis of those data) were combined and re-clustered in UMAP (C). Plotting by tissue of origin showed largely overlapping distributions of the iRGCs and organoid RGCs between the clusters (D), and expression patterns of representative RGC-specific genes in the two samples showed some shared genes but also some differences between the differentiation conditions (E).

in mouse retinas were significantly increased after cell transplantation (around 200 cells/mm<sup>2</sup>) (Figure 7B). Because donor cells are much fewer in number (less than 100 cells per retina; i.e., less than 10 cells/mm<sup>2</sup>), and because, in the acute phase after transplantation, donor

iRGCs express a very low level of *RBPMS* (Figure 6B), the detected increase in *RBPMS*-positive cells is most likely due to enhanced survival of endogenous RGCs. These results indicate that cells differentiated in the iRGC protocol are neuroprotective to endogenous RGCs after optic nerve injury.



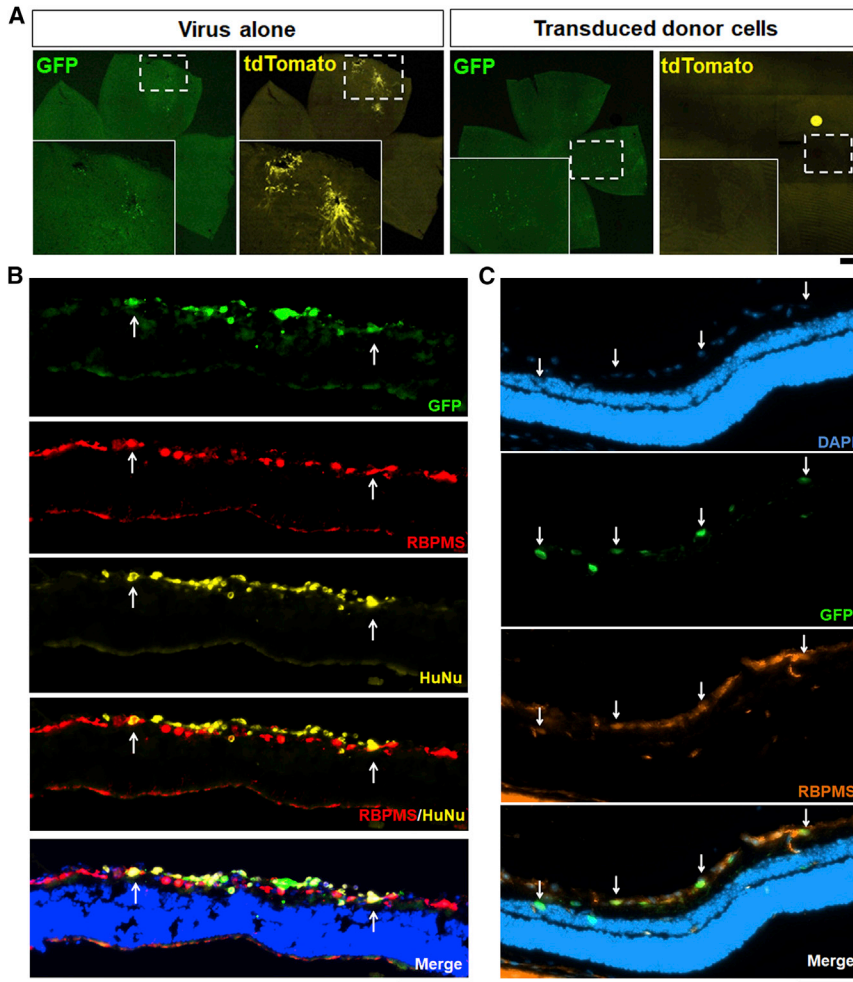

**Figure 6. Donor cells survive and integrate into adult rodent retina 1 week and 1 month after transplantation, respectively**

(A) To distinguish donor cells from host RGCs and rule out viral contamination and cell fusion with host cells, Cre-GFP-LV alone or Cre-GFP-LV-transduced donor cells were injected intravitreally (as labeled) into floxed-tdTomato mice. After direct viral injection (left panels), GFP-transduced host cells expressed tdTomato, but no tdTomato signal was observed in the retinas that were transplanted by Cre-GFP-LV-transduced donor cells (right panels).

(B and C) Differentiated cells were injected intravitreally into rat eyes, and retinas were dissected, cryosectioned, and immunostained against the RGC-specific marker RBPMS 7 days (B) or 1 month (C) after transplantation. Arrows in (B) indicate donor cells co-labeled by RBPMS and human nuclei (HuNu). Arrows in (C) indicate the migration and integration of iRGCs into the ganglion cell layer of the host retina.

Scale bars, 500  $\mu$ m (A) and 100  $\mu$ m (B and C).

## DISCUSSION

The present study describes a new, effective method that more rapidly generates RGC-like neurons from human stem cells by overexpressing a single transcription factor and leveraging a specific growth medium. The entire iRGC generation procedure takes less than 2 weeks, and the resulting iRGCs exhibit high similarity in transcriptomic profiles to 2-month-old fetal or retinal organoid-derived RGCs, although there is still room to optimize reprogramming efficiency. These iRGCs can be transplanted intravitreally, showing survival and integration into rat and mouse host retinas. Thus, the approach described here can enable highly efficient and reproducible iRGC generation, and the simplicity of the system will benefit translational studies on human RGCs.

NGN2 is one of the transcription factors in the basic-helix-loop-helix (bHLH) network that controls proliferation (Britz et al., 2006), cell fate identity (Cai et al., 2000), axon guidance (Seibt et al., 2003), and survival in the devel-

oping nervous system. NGN2 also plays a key role in regulating the initial progression of early retinal neurogenesis and RGC specification. A study on mouse retinal development revealed that NGN2 expression demarcates the leading edge of neurogenesis, in which progenitor cells exit the cell cycle to gain retinal neuronal fate (Hufnagel et al., 2010). Because CHX10 is ubiquitously expressed in retinal progenitors prior to initiation of neurogenesis (Burmeister et al., 1996; Hufnagel et al., 2010), the role of NGN2 in retinal neurogenesis is consistent with our results in the present study; before switching to RGC medium, the transfected cells were already expressing CHX10 protein and stood to accelerate RGC fate induction through exogenous NGN2 expression.

In addition, it has been well established that the Notch signaling pathway is essential in RGC fate decisions (Austin et al., 1995; Bao and Cepko, 1997). Notch activity is down-regulated just before RGC differentiation (Nelson et al., 2006), and reducing Notch signaling can reinitiate RGC production after it has normally ceased during

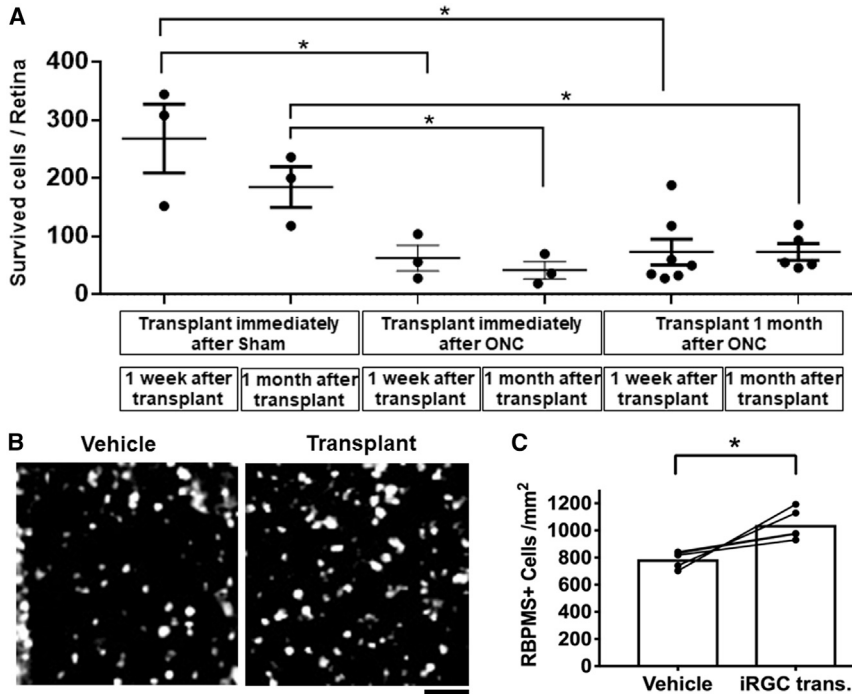

**Figure 7. Survival of donor and host RGCs in ONC models**

(A) Survival of donor cells was decreased in “immediate ONC” mice. Data show similar numbers of persistent donor cells transplanted into “1 month after ONC mice” ( $n = 3$ ).

(B) Example immunostaining against RBPMS of retinal RGCs with and without cell transplantation.

(C) One week after transplantation, the number of RBPMS-positive RGCs was significantly greater in the cell-transplanted group than in the vehicle group ( $n = 4$ ).

development (Silva et al., 2003), consistent with our application of the Notch inhibitor DAPT to enhance the induction of RGC fate. The Notch pathway interacts with the bHLH network by suppressing endogenous *ATOH7* and *NGN2* (Maurer et al., 2014; Miesfeld et al., 2018). Thus, in the present system, hiPSCs/hESCs may be directed to an RGC fate by endogenous (through Notch inhibition) and exogenous (through gene transfer) *NGN2* upregulation.

Although previous studies have indicated that *ATOH7* is directly activated by *NGN2* (Hufnagel et al., 2010; Skowronska-Krawczyk et al., 2009), *ATOH7* was barely expressed in our scRNA-seq. A recent scRNA-seq study on fetal retinas identified a transitional cell population that is *ATOH7/DLL3/HES6* positive (Sridhar et al., 2020). They appear to be at critical post-mitotic junctures on their way to specifying RGC fate. Our qPCR along the first week of differentiation *in vitro* showed that *ATOH7* was transiently upregulated on day 2 and back to baseline on day 6, consistent with no longer detecting it by scRNA-seq also collected on day 6. This result is consistent with another recent study (Smith et al., 2016), and such a transient expression pattern during RGC development has also been observed in mice (Brzezinski et al., 2012; Prasov et al., 2012). Thus, the absence of the transitional marker *ATOH7* by day 6 may indicate synchronized induction of RGCs in the present system.

Comparing differentiation across approaches using deep sequencing and advanced transcriptome analyses pointed to unexpectedly closer alignment between our rapid,

2-dimensional culture approach and slower human fetal retinal development than between fetal development and the similarly slower differentiation evidenced in 3-dimensional organoids. The ganglion cell layer in human fetal retinas is not clearly defined until gestational weeks 9–10 (Luo et al., 2019; Provis et al., 1985). In stem cell-derived retinal organoids, which highly recapitulate the timing of fetal retinal development, RGCs are observed as early as differentiation week 7 (Luo et al., 2018; Zhong et al., 2014). In comparison with fetal retina and retinal organoid datasets using UMAP reduction, which preserves global data structure and demonstrates similarities among clusters (Becht et al., 2018), the similarity of our iRGCs to fetal RGCs or organoid RGCs can be clearly visualized. Further analysis shows shared marker genes between iRGCs and fetal or organoid RGCs. However, our iRGCs are more identical to fetal RGCs than organoid RGCs. For example, like fetal RGCs, the majority of RGC-like cells express *POU4F1* (*BRN3a*), whereas most organoid RGCs are *POU4F2* (*BRN 3b*) positive. The axon skeleton markers *NEFL* and *NEFM* are expressed at significantly higher levels in the fetal retina and iRGCs compared with retinal organoids (Sridhar et al., 2020), consistent with the RGC transcriptional maturation seen in another scRNA-seq study on human fetal retinas (Lu et al., 2020). Even so, we acknowledge that iRGC specification, electrophysiological maturation, and transcriptome consistency to human RGCs may still be improved. For example, our previous studies show that *GDF15* (Chang et al., 2019) and *SOX4* (Chang et al.,

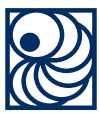

2017) facilitate RGC specification in stem cell-to-RGC differentiation; in future studies, we explore to what degree these factors promote RGC maturation.

Because our protocol was modified from a cortical neuron differentiation protocol, it was essential to determine how much the RGC-like cells in our protocol differ from cortical neurons, acknowledging that, because the neural retina is developmentally an outgrowth of the forebrain, RGCs share many marker genes with other forebrain neurons (Gabriel et al., 2021). Thus, we compared iRGC and iN transcriptomes, including fetal RGCs. iRGCs were much more similar to fetal RGCs than iN progeny, arguing that the modifications in our iRGC protocol are meaningful in generating RGC-like progeny. A consistent result could also be seen when comparing iRGCs and cortical organoids, where iRGCs made up distinct but non-overlapping clusters from cortical organoid progeny. Of course, from a translational standpoint, donor cells need not necessarily be identical to the host cells they are replacing, and it is still unknown to what extent donor cell transcriptional identity to host cells is needed to achieve optimal cell replacement outcomes. It is interesting that our donor cells between 1 week and 1 month showed continued migration into the retina and increased expression of the RGC marker RBPMS, suggesting that their further maturation and integration could be achieved after *in vivo* transplantation.

One of the primary goals in translating the basic science of stem cell differentiation into RGCs is to obtain donor cells for the purpose of transplantation and cell replacement therapy in optic neuropathies. Here we modeled this approach by intravitreal injection of iRGCs in rat and mouse eyes to evaluate the efficacy of cell transplantation. We previously reported that RGCs derived from hESCs successfully migrated into the ganglion cell layer 1 week after transplantation to the adult rat eye (Zhang et al., 2019). We now observed that iRGCs from the rapid protocol also successfully engraft into host retinas by 1 week, although at a low survival rate, consistent with our previous studies (Hertz et al., 2014b; Venugopalan et al., 2016). We also observe further migration to the inner nuclear layer 1 month after transplantation. A number of factors could improve the integration we reported here and should be explored in future studies. For example, the internal limiting membrane (ILM) is a known barrier to donor RGC survival and synaptic integration into the host retina (Zhang et al., 2021). Digestion of the ILM by Pronase E (Zhang et al., 2021) could increase iRGC survival and integration. Expressing or co-injecting survival and growth factors could also be leveraged to promote integration, as has been shown in cell transfer to the spinal cord, for example. (Lu et al., 2012) Our previous study showed that stem cell transplantation enhances donor RGC survival in the host

retina (Wu et al., 2018). Donor cell type and transplant location may also be critical. For example, subretinal transplantation with human retinal organoid pieces or cells dissociated from human retinal organoids can survive for months to years in non-human primate models (Tu et al., 2019). It is still uncertain whether differences in survival or integration are due to donor cell sources, the transplantation method, or the species of the recipients. With the higher expression level of axon-related genes in our rapid protocol-induced RGCs and fetal RGCs, we hypothesize that allowing the iRGCs to extend axons before transplantation may also be a promising way to pre-stimulate the donor cells and promote their survival and axon growth *in vivo*. A recent study of isolation of donor RGCs 1 week after transplantation also demonstrated the importance of axon growth and guidance in donor cell survival (Oswald et al., 2021).

Finally, it will be critical to understand to what degree the injured or degenerating host retina aids or inhibits donor cell integration. To understand whether iRGCs can survive after transplantation into the injured retina, we transplanted donor cells into host eyes immediately or 1 month after optic nerve injury. Compared with transplantation into normal host eyes, survival of donor iRGCs was attenuated in the immediate group or 1 month after ONC. Inflammatory responses in the retina are elevated after optic nerve injury (Ahmad et al., 2014), and optic nerve injury-induced pro-inflammatory cytokines could contribute to donor iRGC death. Phagocytic microglial infiltration peaks around 14 days after crush and is still above basal levels at 2 months (Nadal-Nicolas et al., 2017). In addition, the donor cells could induce an inflammatory response, especially as a xenograft in the present study. Future studies should examine more explicitly the effects of donor cell transplantation on glial and immune response and examine integration at even later time points after injury to allow neuro-inflammation to subside fully and/or include immune-regulating drugs to improve donor cell survival. Conversely, cell transplantation may affect host RGCs after optic nerve injury. We found that iRGC transplantation significantly promotes endogenous RGC survival 1 week after optic nerve injury, although this significant improvement was lost by 2 weeks after ONC. This suggests that iRGC transplantation can transiently delay endogenous RGC death.

These data comprehensively assay iRGCs for gene expression, electrophysiological maturation, and competency to integrate into a host retina after transplantation. Future studies comparing donor cell differentiation methods, stages of maturation, and accompanying factors applied during transplantation may facilitate a translational pipeline toward cell replacement therapy in optic neuropathies.





## Materials and methods

### Corresponding Author

Further information and requests for resources and reagents should be directed to and will be fulfilled by the corresponding author, J.L.G. ([luozm@stanford.edu](mailto:luozm@stanford.edu)).

### Materials availability

This study did not generate new unique reagents. Details about methods, reagents, scRNA-seq analyses, and transplantation can be found in the supplemental information.

### Cell lines and animal strains used in this study

The Brn3b-driven mCherry H7-A81 ESC line ([Sluch et al., 2015](#)) was a kind gift from Dr. Donald Zack (Co-Director, Johns Hopkins Center for Stem Cell and Ocular Regenerative Medicine). 297-1 hiPSCs derived from peripheral blood mononuclear cells of a healthy male donor in his 50s was obtained from the Stanford Stem Cell Core.

All animal research was conducted in compliance with the ARVO statement for use of animals in ophthalmic and vision research and was approved by the Institutional Animal Care and Use Committee at Stanford University. C57BL/6 wild-type (WT) male and female mice 4–6 weeks old and Sprague-Dawley female rats 6 weeks old were obtained from Charles River Laboratories. Cre-driven tdTomato mice were obtained from The Jackson Laboratory.

## DATA AND CODE AVAILABILITY

The datasets generated during this study are available on GEO: GSE200452. Additional datasets used for comparison can be found at GEO: GSE142526, GSE157019, and ArrayExpress: E-MTAB-10632.

## SUPPLEMENTAL INFORMATION

Supplemental information can be found online at <https://doi.org/10.1016/j.stemcr.2022.10.011>.

## AUTHOR CONTRIBUTIONS

Conceptualization, K.-C.C., Z.L., M.W., and J.L.G.; methodology, K.-C.C. and Z. L.; investigation, K.-C.C., Z. L., S.W., C.S., X.X., M.N., M.B., R.R.W., Y.Z., and S.S.; visualization, Z.L. and B.T.; funding acquisition, K.-C.C. and J.L.G.; supervision, M.W. and J.L.G.; writing – original draft, K.-C.C., Z.L., and M.N.; writing – review & editing, J.L.G.

## ACKNOWLEDGMENTS

We thank Dr. Donald Zack for kindly providing the H7 hESC line used in this study. We thank Dr. Thomas A. Reh for intellectual contributions. Library preparation and sequencing were carried out at the DNA Technologies and Expression Analysis Cores at the UC Davis Genome Center, supported by NIH Shared Instrumentation Grant 1S10OD010786-01. This study was supported by the National Eye Institute (P30-EY026877 and F32-EY029137), a Veteran Affairs Merit Award (I01-BX002950 to

J.L.G.), the BrightFocus Foundation, the Gilbert Family Foundation, Research to Prevent Blindness, Inc, and the Foundation Optic Atrophy 1.

## CONFLICT OF INTERESTS

The authors declare no competing interests.

Received: May 10, 2022

Revised: October 17, 2022

Accepted: October 17, 2022

Published: November 10, 2022

## REFERENCES

- Ahmad, S., Elsherbiny, N.M., Bhatia, K., Elsherbini, A.M., Fulzele, S., and Liou, G.I. (2014). Inhibition of adenosine kinase attenuates inflammation and neurotoxicity in traumatic optic neuropathy. *J. Neuroimmunol.* *277*, 96–104. <https://doi.org/10.1016/j.jneuroim.2014.10.006>.
- Austin, C.P., Feldman, D.E., Ida, J.A., Jr., and Cepko, C.L. (1995). Vertebrate retinal ganglion cells are selected from competent progenitors by the action of Notch. *Development* *121*, 3637–3650.
- Bao, Z.Z., and Cepko, C.L. (1997). The expression and function of Notch pathway genes in the developing rat eye. *J. Neurosci.* *17*, 1425–1434.
- Becht, E., McInnes, L., Healy, J., Dutertre, C.A., Kwok, I.W.H., Ng, L.G., Ginhoux, F., and Newell, E.W. (2018). Dimensionality reduction for visualizing single-cell data using UMAP. *Nat. Biotechnol.* *37*, 38–44. <https://doi.org/10.1038/nbt.4314>.
- Britz, O., Mattar, P., Nguyen, L., Langevin, L.M., Zimmer, C., Alam, S., Guillemot, F., and Schuurmans, C. (2006). A role for proneural genes in the maturation of cortical progenitor cells. *Cereb. Cortex* *16 (Suppl 1)*, i138–i151. <https://doi.org/10.1093/cercor/bhj168>.
- Brzezinski, J.A., 4th, Prasov, L., and Glaser, T. (2012). Math5 defines the ganglion cell competence state in a subpopulation of retinal progenitor cells exiting the cell cycle. *Dev. Biol.* *365*, 395–413. <https://doi.org/10.1016/j.ydbio.2012.03.006>.
- Burmeister, M., Novak, J., Liang, M.Y., Basu, S., Ploder, L., Hawes, N.L., Vidgen, D., Hoover, F., Goldman, D., Kalnins, V.I., et al. (1996). Ocular retardation mouse caused by Chx10 homeobox null allele: impaired retinal progenitor proliferation and bipolar cell differentiation. *Nat. Genet.* *12*, 376–384. <https://doi.org/10.1038/ng0496-376>.
- Cai, L., Morrow, E.M., and Cepko, C.L. (2000). Misexpression of basic helix-loop-helix genes in the murine cerebral cortex affects cell fate choices and neuronal survival. *Development* *127*, 3021–3030.
- Chang, K.C., Hertz, J., Zhang, X., Jin, X.L., Shaw, P., Derosa, B.A., Li, J.Y., Venugopalan, P., Valenzuela, D.A., Patel, R.D., et al. (2017). Novel regulatory mechanisms for the SoxC transcriptional network required for visual pathway development. *J. Neurosci.* *37*, 4967–4981. <https://doi.org/10.1523/JNEUROSCI.3430-13.2017>.
- Chang, K.C., Sun, C., Cameron, E.G., Madaan, A., Wu, S., Xia, X., Zhang, X., Tenerelli, K., Nahmou, M., Knasel, C.M., et al. (2019). Opposing effects of growth and differentiation factors in cell-fate



- specification. *Curr. Biol.* 29, 1963–1975.e5. <https://doi.org/10.1016/j.cub.2019.05.011>.
- Chen, M., Chen, Q., Sun, X., Shen, W., Liu, B., Zhong, X., Leng, Y., Li, C., Zhang, W., Chai, F., et al. (2010). Generation of retinal ganglion-like cells from reprogrammed mouse fibroblasts. *Invest. Ophthalmol. Vis. Sci.* 51, 5970–5978. <https://doi.org/10.1167/iovs.09-4504>.
- Deng, F., Chen, M., Liu, Y., Hu, H., Xiong, Y., Xu, C., Liu, Y., Li, K., Zhuang, J., and Ge, J. (2016). Stage-specific differentiation of iPSCs toward retinal ganglion cell lineage. *Mol. Vis.* 22, 536–547.
- Furukawa, T., Kozak, C.A., and Cepko, C.L. (1997). *rax*, a novel paired-type homeobox gene, shows expression in the anterior neural fold and developing retina. *Proc. Natl. Acad. Sci. USA* 94, 3088–3093. <https://doi.org/10.1073/pnas.94.7.3088>.
- Gabriel, E., Albanna, W., Pasquini, G., Ramani, A., Josipovic, N., Mariappan, A., Schinzel, F., Karch, C.M., Bao, G., Gottardo, M., et al. (2021). Human brain organoids assemble functionally integrated bilateral optic vesicles. *Cell Stem Cell* 28, 1740–1757.e8. <https://doi.org/10.1016/j.stem.2021.07.010>.
- Hertz, J., Qu, B., Hu, Y., Patel, R.D., Valenzuela, D.A., and Goldberg, J.L. (2014a). Survival and integration of developing and progenitor-derived retinal ganglion cells following transplantation. *Cell Transplant.* 23, 855–872. <https://doi.org/10.3727/096368913X667024>.
- Hertz, J., Qu, B., Hu, Y., Patel, R.D., Valenzuela, D.A., and Goldberg, J.L. (2014b). Survival and integration of developing and progenitor-derived retinal ganglion cells following transplantation. *Cell Transplant.* 23, 855–872. <https://doi.org/10.3727/096368913X667024>.
- Hufnagel, R.B., Le, T.T., Riesenberger, A.L., and Brown, N.L. (2010). *Neurog2* controls the leading edge of neurogenesis in the mammalian retina. *Dev. Biol.* 340, 490–503. <https://doi.org/10.1016/j.ydbio.2010.02.002>.
- Lamba, D.A., Karl, M.O., Ware, C.B., and Reh, T.A. (2006). Efficient generation of retinal progenitor cells from human embryonic stem cells. *Proc. Natl. Acad. Sci. USA* 103, 12769–12774. <https://doi.org/10.1073/pnas.0601990103>.
- Lin, H.C., He, Z., Ebert, S., Schörmig, M., Santel, M., Nikolova, M.T., Weigert, A., Hevers, W., Kasri, N.N., Taverna, E., et al. (2021). *NGN2* induces diverse neuron types from human pluripotency. *Stem Cell Rep.* 16, 2118–2127. <https://doi.org/10.1016/j.stemcr.2021.07.006>.
- Lu, P., Wang, Y., Graham, L., McHale, K., Gao, M., Wu, D., Brock, J., Blesch, A., Rosenzweig, E.S., Havton, L.A., et al. (2012). Long-distance growth and connectivity of neural stem cells after severe spinal cord injury. *Cell* 150, 1264–1273. <https://doi.org/10.1016/j.cell.2012.08.020>.
- Lu, Y., Shiao, F., Yi, W., Lu, S., Wu, Q., Pearson, J.D., Kallman, A., Zhong, S., Hoang, T., Zuo, Z., et al. (2020). Single-cell analysis of human retina identifies evolutionarily conserved and species-specific mechanisms controlling development. *Dev. Cell* 53, 473–491.e9. <https://doi.org/10.1016/j.devcel.2020.04.009>.
- Luo, Z., Xu, C., Li, K., Xian, B., Liu, Y., Li, K., Liu, Y., Rong, H., Tang, M., Hu, D., et al. (2019). *Islet1* and *Brn3* expression pattern study in human retina and hiPSC-derived retinal organoid. *Stem Cells Int.* 2019, 8786396. <https://doi.org/10.1155/2019/8786396>.
- Luo, Z., Zhong, X., Li, K., Xie, B., Liu, Y., Ye, M., Li, K., Xu, C., and Ge, J. (2018). An optimized system for effective derivation of three-dimensional retinal tissue via *Wnt* signaling regulation. *Stem cells* 36, 1709–1722. <https://doi.org/10.1002/stem.2890>.
- Mathers, P.H., Grinberg, A., Mahon, K.A., and Jamrich, M. (1997). The *Rx* homeobox gene is essential for vertebrate eye development. *Nature* 387, 603–607. <https://doi.org/10.1038/42475>.
- Maurer, K.A., Riesenberger, A.N., and Brown, N.L. (2014). Notch signaling differentially regulates *Atoh7* and *Neurog2* in the distal mouse retina. *Development* 141, 3243–3254. <https://doi.org/10.1242/dev.106245>.
- Miesfeld, J.B., Moon, M.S., Riesenberger, A.N., Contreras, A.N., Koval, R.A., and Brown, N.L. (2018). *Rbpj* direct regulation of *Atoh7* transcription in the embryonic mouse retina. *Sci. Rep.* 8, 10195. <https://doi.org/10.1038/s41598-018-28420-y>.
- Nadal-Nicolás, F.M., Jiménez-López, M., Salinas-Navarro, M., Sobrado-Calvo, P., Vidal-Sanz, M., and Agudo-Barriuso, M. (2017). Microglial dynamics after axotomy-induced retinal ganglion cell death. *J. Neuroinflammation* 14, 218. <https://doi.org/10.1186/s12974-017-0982-7>.
- Nelson, B.R., Gumuscu, B., Hartman, B.H., and Reh, T.A. (2006). Notch activity is downregulated just prior to retinal ganglion cell differentiation. *Dev. Neurosci.* 28, 128–141. <https://doi.org/10.1159/000090759>.
- Oswald, J., Kegeles, E., Minelli, T., Volchkov, P., and Baranov, P. (2021). Transplantation of miPSC/mESC-derived retinal ganglion cells into healthy and glaucomatous retinas. *Mol. Ther. Methods Clin. Dev.* 21, 180–198. <https://doi.org/10.1016/j.omtm.2021.03.004>.
- Pearson, R.A., Gonzalez-Cordero, A., West, E.L., Ribeiro, J.R., Aghaizu, N., Goh, D., Sampson, R.D., Georgiadis, A., Waldron, P.V., Duran, Y., et al. (2016). Donor and host photoreceptors engage in material transfer following transplantation of postmitotic photoreceptor precursors. *Nat. Commun.* 7, 13029. <https://doi.org/10.1038/ncomms13029>.
- Prasov, L., Nagy, M., Rudolph, D.D., and Glaser, T. (2012). *Math5* (*Atoh7*) gene dosage limits retinal ganglion cell genesis. *Neuroreport* 23, 631–634. <https://doi.org/10.1097/WNR.0b013e328355f260>.
- Provis, J.M., van Driel, D., Billson, F.A., and Russell, P. (1985). Development of the human retina: patterns of cell distribution and redistribution in the ganglion cell layer. *J. Comp. Neurol.* 233, 429–451. <https://doi.org/10.1002/cne.902330403>.
- Seibt, J., Schuurmans, C., Gradwhol, G., Dehay, C., Vanderhaeghen, P., Guillemot, F., and Polleux, F. (2003). *Neurogenin2* specifies the connectivity of thalamic neurons by controlling axon responsiveness to intermediate target cues. *Neuron* 39, 439–452. [https://doi.org/10.1016/s0896-6273\(03\)00435-5](https://doi.org/10.1016/s0896-6273(03)00435-5).
- Silva, A.O., Ercole, C.E., and McLoon, S.C. (2003). Regulation of ganglion cell production by Notch signaling during retinal development. *J. Neurobiol.* 54, 511–524. <https://doi.org/10.1002/neu.10156>.



- Skowronska-Krawczyk, D., Chiodini, F., Ebeling, M., Alliod, C., Kundzewicz, A., Castro, D., Ballivet, M., Guillemot, F., Matter-Sadzinski, L., and Matter, J.M. (2009). Conserved regulatory sequences in *Atoh7* mediate non-conserved regulatory responses in retina ontogenesis. *Development* 136, 3767–3777. <https://doi.org/10.1242/dev.033449>.
- Sluch, V.M., Davis, C.h.O., Ranganathan, V., Kerr, J.M., Krick, K., Martin, R., Berlinicke, C.A., Marsh-Armstrong, N., Diamond, J.S., Mao, H.Q., and Zack, D.J. (2015). Differentiation of human ESCs to retinal ganglion cells using a CRISPR engineered reporter cell line. *Sci. Rep.* 5, 16595. <https://doi.org/10.1038/srep16595>.
- Smith, D.K., Yang, J., Liu, M.L., and Zhang, C.L. (2016). Small molecules modulate chromatin accessibility to promote NEUROG2-mediated fibroblast-to-neuron reprogramming. *Stem Cell Rep.* 7, 955–969. <https://doi.org/10.1016/j.stemcr.2016.09.013>.
- Sridhar, A., Hoshino, A., Finkbeiner, C.R., Chitsazan, A., Dai, L., Haugan, A.K., Eschenbacher, K.M., Jackson, D.L., Trapnell, C., Bermingham-McDonogh, O., et al. (2020). Single-cell transcriptomic comparison of human fetal retina, hPSC-derived retinal organoids, and long-term retinal cultures. *Cell Rep.* 30, 1644–1659.e4. <https://doi.org/10.1016/j.celrep.2020.01.007>.
- Tu, H.Y., Watanabe, T., Shirai, H., Yamasaki, S., Kinoshita, M., Matsushita, K., Hashiguchi, T., Onoe, H., Matsuyama, T., Kuwahara, A., et al. (2019). Medium- to long-term survival and functional examination of human iPSC-derived retinas in rat and primate models of retinal degeneration. *EBioMedicine* 39, 562–574. <https://doi.org/10.1016/j.ebiom.2018.11.028>.
- Venugopalan, P., Cameron, E.G., Zhang, X., Nahmou, M., Muller, K.J., and Goldberg, J.L. (2020). Physiologic maturation is both extrinsically and intrinsically regulated in progenitor-derived neurons. *Sci. Rep.* 10, 2337. <https://doi.org/10.1038/s41598-020-58120-5>.
- Venugopalan, P., Wang, Y., Nguyen, T., Huang, A., Muller, K.J., and Goldberg, J.L. (2016). Transplanted neurons integrate into adult retinas and respond to light. *Nat. Commun.* 7, 10472. <https://doi.org/10.1038/ncomms10472>.
- Wang, C.T., Blankenship, A.G., Anishchenko, A., Elstrott, J., Fikhman, M., Nakanishi, S., and Feller, M.B. (2007). GABA(A) receptor-mediated signaling alters the structure of spontaneous activity in the developing retina. *J. Neurosci.* 27, 9130–9140. <https://doi.org/10.1523/JNEUROSCI.1293-07.2007>.
- Wu, S., Chang, K.C., Nahmou, M., and Goldberg, J.L. (2018). Induced pluripotent stem cells promote retinal ganglion cell survival after transplant. *Invest. Ophthalmol. Vis. Sci.* 59, 1571–1576. <https://doi.org/10.1167/iovs.17-23648>.
- Xie, B.B., Zhang, X.M., Hashimoto, T., Tien, A.H., Chen, A., Ge, J., and Yang, X.J. (2014). Differentiation of retinal ganglion cells and photoreceptor precursors from mouse induced pluripotent stem cells carrying an *Atoh7/Math5* lineage reporter. *PLoS One* 9, e112175. <https://doi.org/10.1371/journal.pone.0112175>.
- Zhang, K.Y., Tuffy, C., Mertz, J.L., Quillen, S., Wechsler, L., Quigley, H.A., Zack, D.J., and Johnson, T.V. (2021). Role of the internal limiting membrane in structural engraftment and topographic spacing of transplanted human stem cell-derived retinal ganglion cells. *Stem Cell Rep.* 16, 149–167. <https://doi.org/10.1016/j.stemcr.2020.12.001>.
- Zhang, X., Tenerelli, K., Wu, S., Xia, X., Yokota, S., Sun, C., Galvao, J., Venugopalan, P., Li, C., Madaan, A., et al. (2019). Cell transplantation of retinal ganglion cells derived from hESCs. *Restor. Neurol. Neurosci.* 38, 131–140.
- Zhang, Y., Pak, C., Han, Y., Ahlenius, H., Zhang, Z., Chanda, S., Marro, S., Patzke, C., Acuna, C., Covy, J., et al. (2013). Rapid single-step induction of functional neurons from human pluripotent stem cells. *Neuron* 78, 785–798. <https://doi.org/10.1016/j.neuron.2013.05.029>.
- Zhong, X., Gutierrez, C., Xue, T., Hampton, C., Vergara, M.N., Cao, L.H., Peters, A., Park, T.S., Zambidis, E.T., Meyer, J.S., et al. (2014). Generation of three-dimensional retinal tissue with functional photoreceptors from human iPSCs. *Nat. Commun.* 5, 4047. <https://doi.org/10.1038/ncomms5047>.



**Stem Cell Reports, Volume 17**

**Supplemental Information**

**Directly induced human retinal ganglion cells mimic fetal RGCs and are neuroprotective after transplantation *in vivo***

**Ziming Luo, Kun-Che Chang, Suqian Wu, Catalina Sun, Xin Xia, Michael Nahmou, Minjuan Bian, Rain R. Wen, Ying Zhu, Sahil Shah, Bogdan Tanasa, Marius Wernig, and Jeffrey L. Goldberg**

## **Supplementary method:**

### **1. Primary RGC culture and lentivirus construction**

RGCs from P2 mice were purified and cultured as published (Trakhtenberg et al., 2014). Briefly, whole retinas were dissected and dissociated with papain, and subsequently were immunopanned with the Thy1 antibody. Purified RGCs were plated on poly-D-lysine- and laminin-coated coverslips and cultured for 3-4 days in RGC culture medium (describe below) before calcium imaging.

Plasmids of lentivirus (rtTA, NGN2, and EGFP) were generated as previously published (Zhang et al., 2013). Lentiviruses (rtTA, NGN2, and EGFP,  $10^8$  TU/ml) were produced by Stanford Gene and Virus Core, and AAVnerGene, Inc. LV-CMV-Cre-GFP-puro lentivirus was purchased from SignaGen Laboratories.

### **2. Generation of iRGCs from human ESCs and iPSCs**

hESCs and hiPSCs were treated with 0.5% EDTA and plated on Matrigel (BD Biosciences)-coated plates at 70% confluence in StemFlex (Thermo Fisher Scientific) on day -2. On day -1, lentivirus prepared as previously described (Zhang *et al.*, 2013) was added in fresh StemFlex medium. On day 0, the culture medium was replaced with NBF (1% B27 supplement, 0.5% N2 supplement, 20 ng/ml fibroblast growth factor and 1% penicillin/streptomycin in DMEM-F12 medium). Doxycycline (2  $\mu$ g/ml, Clontech) was added on day 0 to induce TetO expression. On day 1, 2 $\mu$ g/ml puromycin was added in fresh NBF medium for a 24 hr selection. On day 2, the culture medium was replaced with RGC culture medium (Full Sato, prepared as previously described (Wu et al., 2018)), including insulin (5  $\mu$ g/ml, Sigma), sodium pyruvate (1 mM, Sigma), penicillin/streptomycin (1%, Thermo Fisher Scientific), Sato supplement (1:100), L-glutamine (1 mM, Sigma), triiodothyronine (T3, 40 ng/ml, Sigma), *N*-acetyl cysteine (5  $\mu$ g/ml, Sigma), brain-derived neurotrophic factor (50 ng/ml, Peprotech), ciliary neurotrophic factor (10 ng/ml, Peprotech), forskolin (5 mM, Sigma) (Barres et al., 1988) plus Notch inhibitor DAPT (10  $\mu$ M, EMD Millipore) and glial derived neurotrophic factor (50 $\mu$ g/ml, Peprotech) for another 4 days, changing half of the medium every other day.

### **3. Quantitative real-time PCR**

Total RNA was isolated from retinal tissue or cells in culture according to the manufacturer's

protocol (RNeasy Microarray Tissue Mini Kit, Qiagen). RNA (5 µg) was reverse transcribed using iScript™ cDNA Synthesis Kit (Bio-Rad). For qRT-PCR, the iTaq™ Universal SYBR® Green Supermix (Bio-Rad) was used according to the manufacturer's protocol on a CFX Connect™ Real-Time PCR Detection System (Bio-Rad). Taqman primers for human *GAPDH*, *OCT4*, *NANOG*, *PAX6*, *POU4F1*, and *ISL1* were directly purchased from Thermo Fisher Scientific (Waltham, MA USA). The thermocycler parameters were 94 °C for 5 min, followed by 40 cycles of 94 °C for 30 sec, 56 °C for 30 sec and 72 °C for 60 sec. For the qPCR in Fig. 1, the LightCycler480 SYBR Green I Master (4887352001-1; Roche, Basel Switzerland) was used according to the manufacturer's protocol. Primers for human *GAPDH* (forward: GTCTCCTCTGACTTCAACAGCG, reverse: ACCACCCTGTTGCTGTAGCCAA), *ATOH7* (forward: GGTCTCCACTGTGAGCACTTCG, reverse: TGG AAGCCGAAGAGTCTCTGGC), *DLL3* (forward: CACTCAACAACCTAAGGACGCAG, reverse: GAGCGTAGATGGAAGGAGCAGA), and *HES6* (forward: GCTGGAGAACGCCGAAGTGCT, reverse: TGGACACGAACGTGTGCACCTC) were synthesis by Genewiz (South Plainfield, NJ, USA). *GADPH* was used as internal control. All qRT-PCR data was analyzed by  $2\Delta\Delta C_t$ . All experiments were repeated at least three times for statistical comparison.

#### **4. Immunostaining**

Cells cultured on coated glass slides or dishes were fixed with warm 4% PFA at room temperature for 20 min and then washed with PBS three times. After permeabilizing with 0.1% Triton X-100, cells were blocked with 10% BSA and incubated with primary antibodies including mouse anti-Brn3a antibody (1:50, Millipore, MAB1585), rabbit anti-Tuj1 (1:300, Cell Signaling Technology, CST5568), rabbit anti-Islet1 (1:250, Abcam, Ab109517), mouse anti-CHX10 (1:20, Santa Cruz Technology, sc374151), mouse anti-NEFL (1:50, Santa Cruz Technology, sc20012) and rabbit anti-Ki67 (1:200, Abcam, Ab115580) overnight at 4 °C. Alexa-488, Alexa-546, and Alexa-647 (Thermo Fisher Scientific) fluorescent antibodies were used for secondary detection. DAPI (Life Technologies) was used for nuclei staining.

Eye globes of transplanted mice were fixed with 4% PFA overnight, followed by 15% and 30% sucrose overnight. Cryo-sectioning was performed, and the 10 µm sections were incubated with



guinea pig anti-RBPMS (gift from Dr. Yang Hu, Stanford Ophthalmology) and mouse anti-human nuclear antigen antibody (1:200, Abcam, Ab191181) overnight at 4 °C in humidity chamber. Goat Alexa-488 antibody (Thermo Fisher Scientific) and DAPI were used for fluorescence and nuclei detection, respectively. All images were taken using fluorescence microscopy (Zeiss) or confocal microscopy (LSM 880, Zeiss).

## **5. Calcium imaging**

Coverslips with cultured cells were incubated for 30 min at room temperature with 4 μM Fluo 4-AM (Invitrogen, F14201) in Tyrode's solution (pH 7.4): NaCl 129 mM, KCl 5 mM, CaCl<sub>2</sub> 2 mM, MgCl<sub>2</sub> 1 mM, glucose 30 mM and HEPES 25 mM, containing 1 mg/ml bovine serum albumin. After washing with 'Tyrode's solution, the cells were placed in an imaging chamber (RC-26GLP, Warner Instruments) and perfused with 'Tyrode's solution while imaging. Calcium imaging was performed on an inverted fluorescence microscope (AxioObserver, Zeiss) with a fast-switching light source (DG-4, Sutter Instruments) using MetaFluor software (Molecular Devices) working within a linear range of the camera. Regions of interest (ROIs) were drawn around labeled cell bodies corresponding to cells with a neuronal morphology. As a control, in each field of view, 1-2 ROIs were also drawn around cells with non-neuronal, glia-like morphology. Calcium responses within ROIs were observed as changes in the fluorescence ratio (340/380) upon sequential stimulation with muscimol (100 μM, Sigma-Aldrich, M1523) and KCl (30 mM). Each point on the summary plots corresponds to the fraction of cells in each experiment that responded to muscimol. KCl was used as a positive stimulus for neuronal cells, and 100% of the cells responded to KCl in the present experiments.

## **6. Cell dissociation for deep sequencing**

iRGCs were dissociated using Accutase (Innovative Cell Technologies) for 15-20 minutes on day 6. Cell pellets were resuspended in PBS containing 0.04% bovine serum albumin and filtered through a 40 μm cell strainer (Falcon, Cat#352340) to remove cell clumps before counting with a hemocytometer. Barcoded 3' single-cell libraries were prepared from single cell suspensions using the Chromium Single Cell 3' Library and Gel Bead kit (10X Genomics, Pleasanton, California) for sequencing according to the recommendations of the manufacturer. The cDNA and library fragment size distribution were verified via micro-capillary gel electrophoresis on a Bioanalyzer

2100 (Agilent, Santa Clara, CA). The libraries were quantified by fluorometry on a Qubit instrument (LifeTechnologies, Carlsbad, CA) and by qPCR with a Kapa Library Quant kit (Kapa Biosystems-Roche) prior to sequencing. Eight libraries were sequenced per lane on a NovaSeq 6000 sequencer (Illumina, San Diego, CA) with paired-end 150 bp reads.

## 7. scRNA-seq analysis

### 7.1 Data processing

We applied fastp with the default parameters filtering the adaptor sequence, and removed the low-quality reads to achieve clean data. Then the feature-barcode matrices were obtained by aligning reads to the human genome using CellRanger v3.0.0. Seurat analysis was performed in R using Seurat (v3.2.0), ggplot2, dplyr. The data were normalized by log normalization and scaled, and PCs were computed. Cell clustering was visualized by tSNE dimensional reduction in Figure 3. For Figure 4 and Figure 5 A-B, different time points of fetal retina (Day-59 and -82) and retinal organoid (Day-60 and -82) datasets were integrated, respectively, by identifying "anchors" across single-cell datasets (Stuart et al., 2019). Subsequently, iRGCs (clusters 3 and 4) were extracted as subsets from the Figure 3 dataset. iRGC data were then integrated with a fetal dataset or retinal organoid dataset. Cell clustering was visualized by UMAP dimensional reduction. For Figure 5C, RGCs in day-45 retinal organoids were identified by *SNCG*, *GAP43*, and *NEFL* and extracted. Then, we integrated the iRGC data and day-45 retinal organoid-derived RGC data and performed UMAP dimensional reduction. For Figure 6, the whole rapid protocol differentiation dataset was integrated with a Day-5 iN dataset or Day-93 cortical organoid dataset (Fair et al., 2020).

### 7.2 Pseudotime analyses

We applied the single-cell Trajectory analysis utilizing Monocle2 with default parameters. We perform a completely "unsupervised" analysis for the machine learning approach. Then, we reduced dimensions by DDR Tree and ordered cells in pseudotime. By using the function "plot\_genes\_branched\_pseudotime", we plotted *SOX4* and *SOX11* to show the different kinetic trends for each lineage along pseudotime.

### 7.3 Gene ontology (GO) analyses

The GO analyses were performed on Enrichr (<https://maayanlab.cloud/Enrichr/>) (Chen et al., 2013; Kuleshov et al., 2016). The top 5 GO annotations are shown in the present data.

## **8. Animals for cell transplant**

All animal research was conducted in compliance with ARVO statement for the use of animals in ophthalmic and vision research and was approved by Institutional Animal Care and Use Committee at Stanford University. C57BL/6 wild-type (WT) male and female mice at 4 to 6 weeks old and Sprague Dawley female rats at 6 weeks old were obtained from Charles River.  $10^4$  and  $10^5$  differentiated cells were intravitreally injected to mice and rats, respectively. Optic nerve crush (ONC) was conducted on 6~8-week old male mice as previously described (Cameron et al., 2020). iRGC were injected either immediately or 1 month after ONC, and the retinas were collected 1 week or 1 month after transplant. Endogenous RGCs were stained by RBPMS and counted manually following the previously published protocol (Cameron *et al.*, 2020). Cre-driven tdTomato mice were obtained from The Jackson Laboratory. In some cases, control (no ONC) donor cell engraftment failed altogether; merging control groups across experiments was used to facilitate comparisons.

## **9. Statistical analysis**

Results are shown as the Means  $\pm$  SEM of at least three experiments. Data were analyzed by ANOVA with Tukey's test and paired t-test with a *P*-value of  $<0.05$  considered significant.

## References:

- Barres, B.A., Silverstein, B.E., Corey, D.P., and Chun, L.L. (1988). Immunological, morphological, and electrophysiological variation among retinal ganglion cells purified by panning. *Neuron* *1*, 791-803.
- Cameron, E.G., Xia, X., Galvao, J., Ashouri, M., Kapiloff, M.S., and Goldberg, J.L. (2020). Optic Nerve Crush in Mice to Study Retinal Ganglion Cell Survival and Regeneration. *Bio Protoc* *10*. 10.21769/BioProtoc.3559.
- Chen, E.Y., Tan, C.M., Kou, Y., Duan, Q., Wang, Z., Meirelles, G.V., Clark, N.R., and Ma'ayan, A. (2013). Enrichr: interactive and collaborative HTML5 gene list enrichment analysis tool. *BMC Bioinformatics* *14*, 128. 10.1186/1471-2105-14-128.
- Fair, S.R., Julian, D., Hartlaub, A.M., Pusuluri, S.T., Malik, G., Summerfield, T.L., Zhao, G., Hester, A.B., Ackerman, W.E.t., Hollingsworth, E.W., et al. (2020). Electrophysiological Maturation of Cerebral Organoids Correlates with Dynamic Morphological and Cellular Development. *Stem Cell Reports* *15*, 855-868. 10.1016/j.stemcr.2020.08.017.
- Kuleshov, M.V., Jones, M.R., Rouillard, A.D., Fernandez, N.F., Duan, Q., Wang, Z., Koplev, S., Jenkins, S.L., Jagodnik, K.M., Lachmann, A., et al. (2016). Enrichr: a comprehensive gene set enrichment analysis web server 2016 update. *Nucleic Acids Res* *44*, W90-97. 10.1093/nar/gkw377.
- Stuart, T., Butler, A., Hoffman, P., Hafemeister, C., Papalexi, E., Mauck, W.M., 3rd, Hao, Y., Stoeckius, M., Smibert, P., and Satija, R. (2019). Comprehensive Integration of Single-Cell Data. *Cell* *177*, 1888-1902 e1821. 10.1016/j.cell.2019.05.031.
- Trakhtenberg, E.F., Wang, Y., Morkin, M.I., Fernandez, S.G., Mlacker, G.M., Shechter, J.M., Liu, X., Patel, K.H., Lapins, A., Yang, S., et al. (2014). Regulating Set-beta's Subcellular Localization Toggles Its Function between Inhibiting and Promoting Axon Growth and Regeneration. *The Journal of neuroscience : the official journal of the Society for Neuroscience* *34*, 7361-7374. 10.1523/JNEUROSCI.3658-13.2014.
- Wu, S., Chang, K.C., Nahmou, M., and Goldberg, J.L. (2018). Induced Pluripotent Stem Cells Promote Retinal Ganglion Cell Survival After Transplant. *Invest Ophthalmol Vis Sci* *59*, 1571-1576. 10.1167/iovs.17-23648.
- Zhang, Y., Pak, C., Han, Y., Ahlenius, H., Zhang, Z., Chanda, S., Marro, S., Patzke, C., Acuna, C., Covy, J., et al. (2013). Rapid single-step induction of functional neurons from human pluripotent stem cells. *Neuron* *78*, 785-798. 10.1016/j.neuron.2013.05.029.

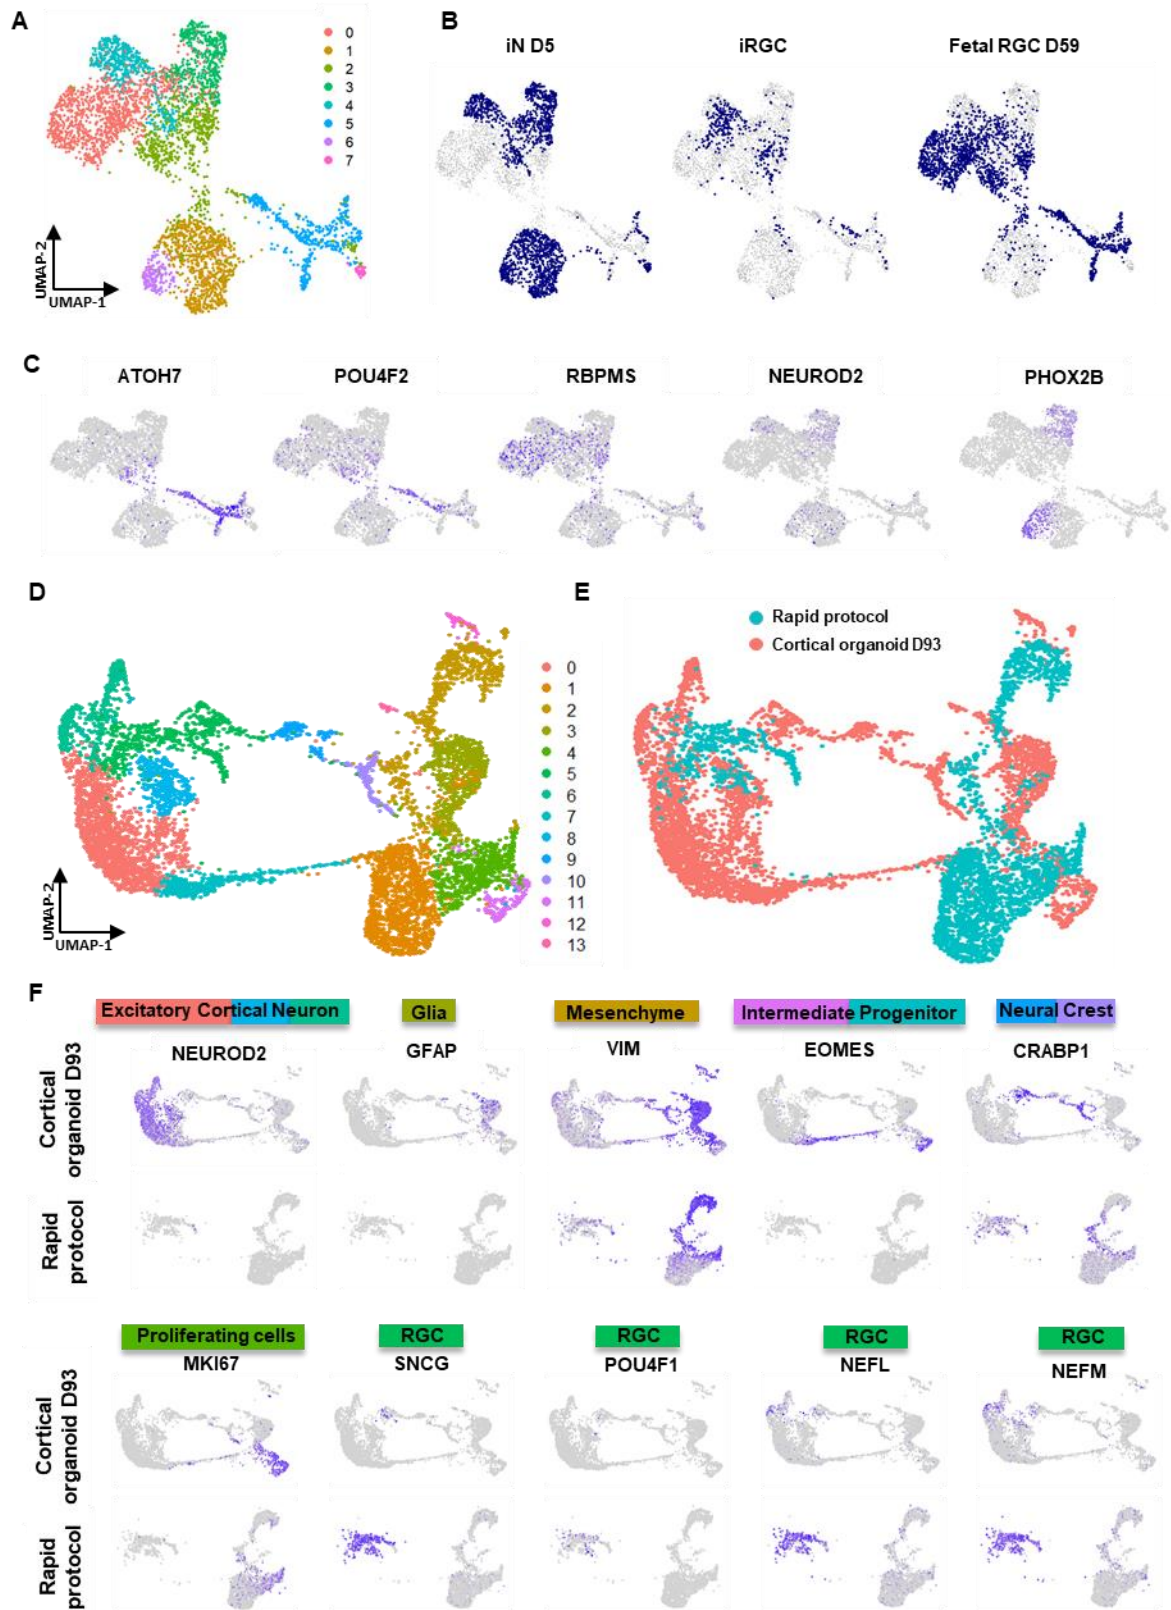



**Figure. S1. Rapid protocol-derived iRGCs are transcriptionally different from iNs and from cortical organoid cell progeny.** (A) Combined UMAP plot showing iRGCs, D59 fetal RGCs, and iNs derived from the original protocol. (B) UMAP plotted by tissue of origin demonstrates overlap of iRGC with subsets of fetal RGCs, but iN progeny are largely distinct from fetal RGCs, particularly in clusters 1, 3 and 6. (C) Feature plots show that iRGCs express RGC markers, but not the cortical neuron marker, *NEUROD2*, nor the rhombencephalon/brain stem marker, *PHOX2B*, which is expressed in iN progeny. (D) Combined UMAP plot of D93 cortical organoid and rapid protocol-derived cells. (E) UMAP plot showing the tissues of origin demonstrates that many clusters (from A) contain cells of each differentiation protocol, although the iRGCs are largely segregated from the cortical organoid cells in each case. (F) Feature plots of cortical cell type genes and RGC-specific genes in the combined dataset (labeled above each plot) demonstrate that among neuronal clusters 0, 6, and 7, RGCs make up a distinct subset largely absent from cortical organoid differentiation. Conversely, cortical organoid-derived intermediate progenitors and other progeny are largely absent in rapid-protocol iRGC differentiation. Plots were split by tissue of origin.
